# Supplementary material for: Distal Pancreatectomy with Celiac Axis Resection: Systematic Review and Meta-Analysis
Source: MDPI journal article supplement (doi:10.3390/cancers13081967), 2021-04-19
Supplement: s1 [file s1]

## SUPPLEMENTARY MATERIAL

**Table S1.** Full literature search performed on online databases

| Keyword used and combined for the search* | PubMed** | Scopus** | WOS** |
|-------------------------------------------|----------|----------|-------|
| DP-CAR                                    | 69       | 76       | 62    |
| Celiac axis resection                     | 844      | 403      | 342   |
| Distal pancreatectomy                     | 4109     | 4998     | 3901  |
| Pancreatic Carcinoma                      | 7347     | 40013    | 29596 |
| Appleby                                   | 2190     | 334      | 317   |
| Arterial resection pancreatic             | 2056     | 987      | 706   |

\* systematic literature search using the specified databases was performed in December 2020.

\*\*number of results

**Table S2.** Critical appraisal of included studies using Newcastle Ottawa scale. **Stars number**

| Study, year            | Selection <sup>a</sup> | Comparability <sup>b</sup> | Outcome <sup>c</sup> | Total |
|------------------------|------------------------|----------------------------|----------------------|-------|
| <i>Beane, 2015</i>     | 4                      | 0                          | 1                    | 5     |
| <i>Ham, 2015</i>       | 4                      | 0                          | 2                    | 6     |
| <i>Hishinuma, 2007</i> | 4                      | 0                          | 1                    | 5     |
| <i>Malinka, 2020</i>   | 4                      | 0                          | 2                    | 6     |
| <i>Okada, 2012</i>     | 4                      | 0                          | 2                    | 6     |
| <i>Peters, 2016</i>    | 4                      | 1                          | 1                    | 6     |
| <i>Storkholm, 2020</i> | 4                      | 0                          | 2                    | 6     |
| <i>Sugiura, 2017</i>   | 4                      | 0                          | 2                    | 6     |
| <i>Takahashi, 2011</i> | 4                      | 0                          | 1                    | 5     |
| <i>Wu, 2010</i>        | 4                      | 0                          | 2                    | 6     |
| <i>Yamamoto, 2017</i>  | 4                      | 1                          | 2                    | 7     |

<sup>a</sup> Maximum 4 stars; <sup>b</sup> Maximum 2 stars; <sup>c</sup> Maximum 3 stars.
